# Supplementary material for: COVID-19 and chronological aging: senolytics and other anti-aging drugs for the treatment or prevention of corona virus infection?
Source: publisher site journal article supplement (doi:10.18632/aging.103001), 2020-03-30
Supplement: Supplementary file [file aging-v12i8-103001-supplementary-material-SD1.pdf]

## SUPPLEMENTARY FIGURE

**Cytokines and Viruses are both made of Proteins**

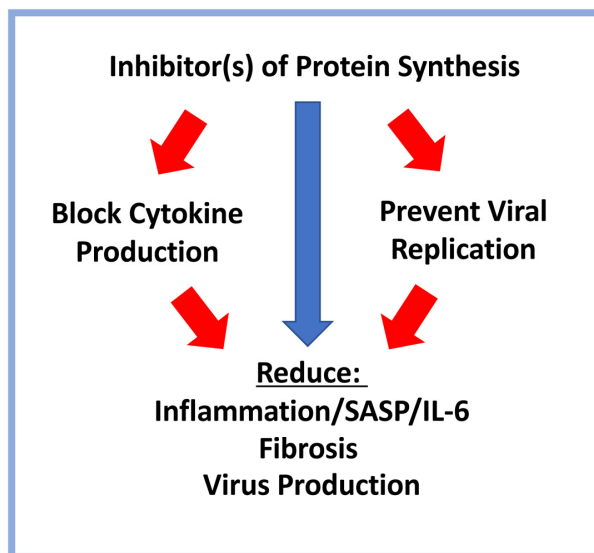

**Doxycycline, Azithromycin and Rapamycin All Inhibit Protein Synthesis  
All are FDA-Approved Drugs**

**Supplementary Figure 1. Inhibitor(s) of protein synthesis block inflammation and viral replication.** Azithromycin, Doxycycline and Rapamycin are all FDA-approved drugs that behave as inhibitors of protein synthesis and experimentally have been shown to reduce inflammation and viral replication. Mechanistically, this is because cytokines and viruses are both made of proteins. Both use the cellular ribosomes for protein translation. Inhibiting virus production should help to clinically reduce viral transmission to other patients.
